# Supplementary material for: Utilization of Agroresidues for the Production of Xylanase by Bacillus safensis XPS7 and Optimization of Production Parameters
Source: MDPI journal article supplement (doi:10.3390/fermentation8050221), 2022-05-12
Supplement: s1 [file s1]

## Supplementary Materials

### Utilization of agroresidues for the production of xylanase by *Bacillus safensis* XPS7 and optimization of production parameters

Shikha Devi, Divya Dwivedi and Arvind Kumar Bhatt\*

Department of Biotechnology, Himachal Pradesh University, Summerhill-171005, Shimla, India

\*E. mail: bhtarvind@yahoo.com

Tel: 0177-2831948

**Supplementary Table S1:** Alignment view using combination of NCBI GenBank and RDP database

| Alignment view                                                                      | ID                          | Alignment results | Sequence description                               |
|-------------------------------------------------------------------------------------|-----------------------------|-------------------|----------------------------------------------------|
|    | <a href="#">XPS7</a>        | 1.00              | Studied sample                                     |
|    | <a href="#">NR_113945.1</a> | 0.99              | <i>Bacillus safensis</i> strain NBRC 100820        |
|    | <a href="#">NR_148787.1</a> | 0.99              | <i>Bacillus australimaris</i> strain MCCC 1A05787  |
|    | <a href="#">NR_112637.1</a> | 0.99              | <i>Bacillus pumilus</i> strain NBRC 12092          |
|  | <a href="#">NR_148786.1</a> | 0.99              | <i>Bacillus zhangzhouensis</i> strain MCCC 1A08372 |
|  | <a href="#">NR_041794.1</a> | 0.99              | <i>Bacillus safensis</i> FO-36b                    |
|  | <a href="#">NR_042337.1</a> | 0.99              | <i>Bacillus altitudinis</i> 41KF2b                 |
|  | <a href="#">NR_043242.1</a> | 0.99              | <i>Bacillus pumilus</i> strain ATCC 7061           |
|  | <a href="#">NR_118439.1</a> | 0.99              | <i>Bacillus aerius</i> strain 24K                  |
|  | <a href="#">NR_148244.1</a> | 0.99              | <i>Bacillus xiamenensis</i> strain MCCC 1A00008    |
|  | <a href="#">NR_042336.1</a> | 0.99              | <i>Bacillus stratosphericus</i> strain 41KF2a      |

**Supplementary Table S2:** Composition of different media used (g/l)

| <b>Medium composition</b>                           | <b>M1</b><br>(John & Schmidt, 1988) | <b>M2</b><br>(Chan and Au, 1987) | <b>M3</b><br>(Thorton 1922) | <b>M4</b><br>(Robson & Chamblis , 1984) | <b>M5</b><br>(Modifi ed Riviere , 1961) | <b>M6</b><br>(Reese & Mandel , 1963) | <b>M7</b><br>(Wakeam & Fracet, 1922) | <b>M8</b><br>(Modified Horikoshi, 2012) | <b>M9</b><br>Xylan basal broth | <b>M10</b><br>YPX medi um | <b>MM11</b><br>Xylan basal broth |
|-----------------------------------------------------|-------------------------------------|----------------------------------|-----------------------------|-----------------------------------------|-----------------------------------------|--------------------------------------|--------------------------------------|-----------------------------------------|--------------------------------|---------------------------|----------------------------------|
| Wheat Straw + Wheat Bran                            | 40                                  | 40                               | 40                          | 40                                      | 40                                      | 40                                   | 40                                   | 40                                      | 40                             | 40                        | 40                               |
| NaNO <sub>3</sub>                                   | -                                   | 1                                | -                           | 1                                       | -                                       | -                                    | -                                    | 1                                       | -                              | -                         | -                                |
| Na <sub>2</sub> HPO <sub>4</sub> .7H <sub>2</sub> O | -                                   | 1.2                              | -                           | -                                       | -                                       | -                                    | -                                    | 1.2                                     | -                              | -                         | -                                |
| KH <sub>2</sub> PO <sub>4</sub>                     | 1                                   | 0.9                              | 2                           | 6.89                                    | 10                                      | 0.5                                  | 1                                    | 9                                       | -                              | -                         | -                                |
| K <sub>2</sub> HPO <sub>4</sub>                     | -                                   | -                                | -                           | -                                       | 4.80                                    | -                                    | 1.5                                  | -                                       | -                              | 1                         | -                                |
| MgSO <sub>4</sub> . 7H <sub>2</sub> O               | 0.2                                 | 0.5                              | 0.3                         | 0.3                                     | 0.8                                     | 0.2                                  | -                                    | 0.5                                     | -                              | 0.2                       | 0.5                              |
| KCl                                                 | -                                   | 0.5                              | -                           | -                                       | -                                       | -                                    | -                                    | 0.5                                     | -                              | -                         | -                                |
| Yeast extract                                       | -                                   | 6                                | -                           | 0.5                                     | 5                                       | -                                    | 3                                    | 0.5                                     | 5                              | 5                         | 2                                |
| Casein hydrolysate                                  | -                                   | -                                | -                           | -                                       | -                                       | -                                    | -                                    | 0.5                                     | -                              | -                         | -                                |
| Tryptone                                            | -                                   | -                                | -                           | 1.5                                     | Traces                                  | Traces                               | -                                    | -                                       | -                              | -                         | -                                |
| FeCl <sub>3</sub> .6H <sub>2</sub> O                | Traces                              | -                                | -                           | -                                       | -                                       | -                                    | -                                    | -                                       | -                              | -                         | -                                |
| (NH <sub>4</sub> ) <sub>2</sub> SO <sub>4</sub>     | -                                   | -                                | 14                          | -                                       | -                                       | -                                    | -                                    | -                                       | -                              | -                         | -                                |
| NH <sub>4</sub> Cl                                  | -                                   | -                                | -                           | 2.5                                     | 1                                       | -                                    | 2                                    | -                                       | -                              | -                         | -                                |
| MnCl <sub>2</sub>                                   | -                                   | -                                | -                           | -                                       | 0.01                                    | -                                    | -                                    | -                                       | -                              | -                         | -                                |
| CaCl <sub>2</sub>                                   | 0.1                                 | -                                | 0.3                         | -                                       | 0.05                                    | -                                    | -                                    | -                                       | -                              | -                         | -                                |
| FeSO <sub>4</sub>                                   | -                                   | -                                | 5                           | 0.3                                     | -                                       | -                                    | 0.05                                 | -                                       | -                              | -                         | 0.1                              |
| ZnSO <sub>4</sub>                                   | -                                   | -                                | -                           | -                                       | 0.05                                    | -                                    | Traces                               | -                                       | -                              | -                         | -                                |
| ZnCl <sub>2</sub>                                   | -                                   | -                                | 1.7                         | 3                                       | -                                       | -                                    | -                                    | -                                       | -                              | -                         | -                                |
| CoCl <sub>2</sub>                                   | -                                   | -                                | 0.2                         |                                         | -                                       | -                                    | -                                    | -                                       | -                              | -                         | -                                |
| NaCl                                                | 0.1                                 | -                                | -                           | -                                       | -                                       | -                                    | -                                    | -                                       | -                              | -                         | -                                |
| KNO <sub>3</sub>                                    | 0.5                                 | -                                | -                           | -                                       | -                                       | -                                    | -                                    | -                                       | -                              | -                         | -                                |
| Peptone                                             | -                                   | -                                | 1                           | -                                       | -                                       | -                                    |                                      | 2.5                                     | 2.5                            | 5                         | -                                |
| Egg Albumin                                         | -                                   | -                                | -                           | -                                       | -                                       | 0.25                                 |                                      | -                                       | -                              | -                         | -                                |
| Tween-80 (0.01%)                                    | -                                   | -                                | 2                           | -                                       | -                                       | -                                    | -                                    | -                                       | -                              | -                         | -                                |
| Urea                                                | 1                                   | -                                | 0.3                         | -                                       | -                                       | -                                    | -                                    | -                                       | -                              | -                         | 5                                |

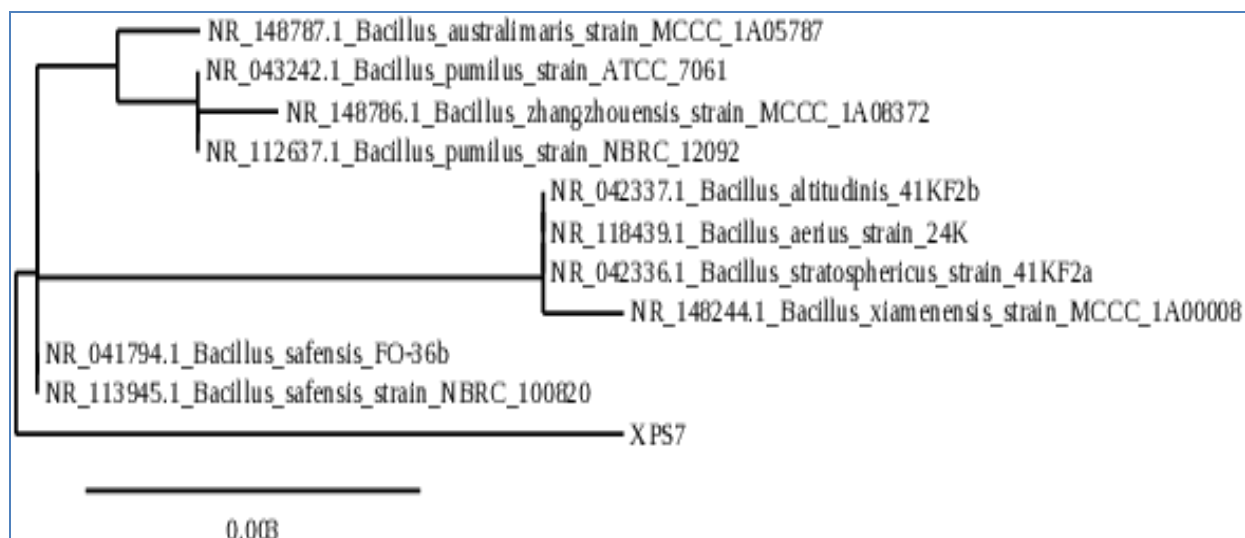

**Supplementary Figure S1:** Phylogenetic tree made using neighbour joining method.

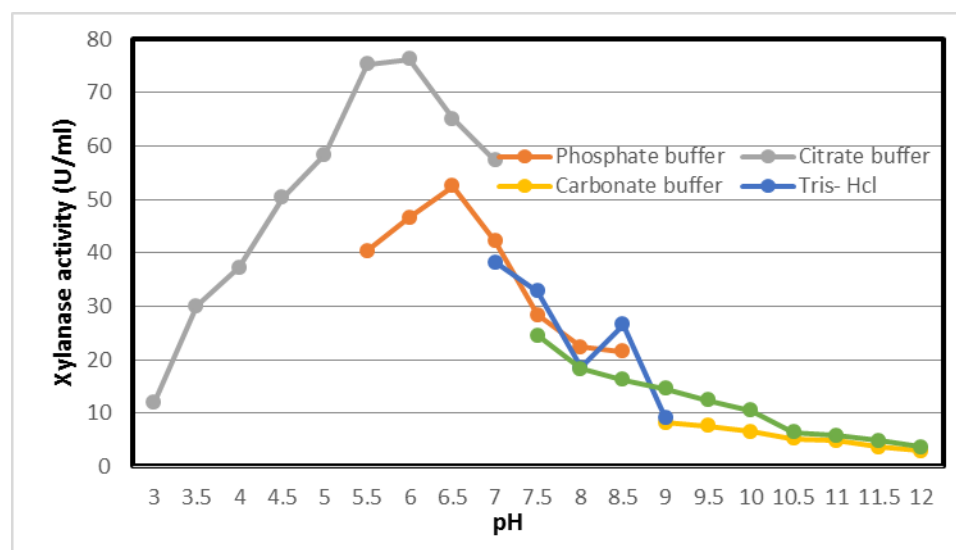

**Supplementary Figure S2:** Effect of different buffer systems and pH on the activity of xylanase by XPS7.

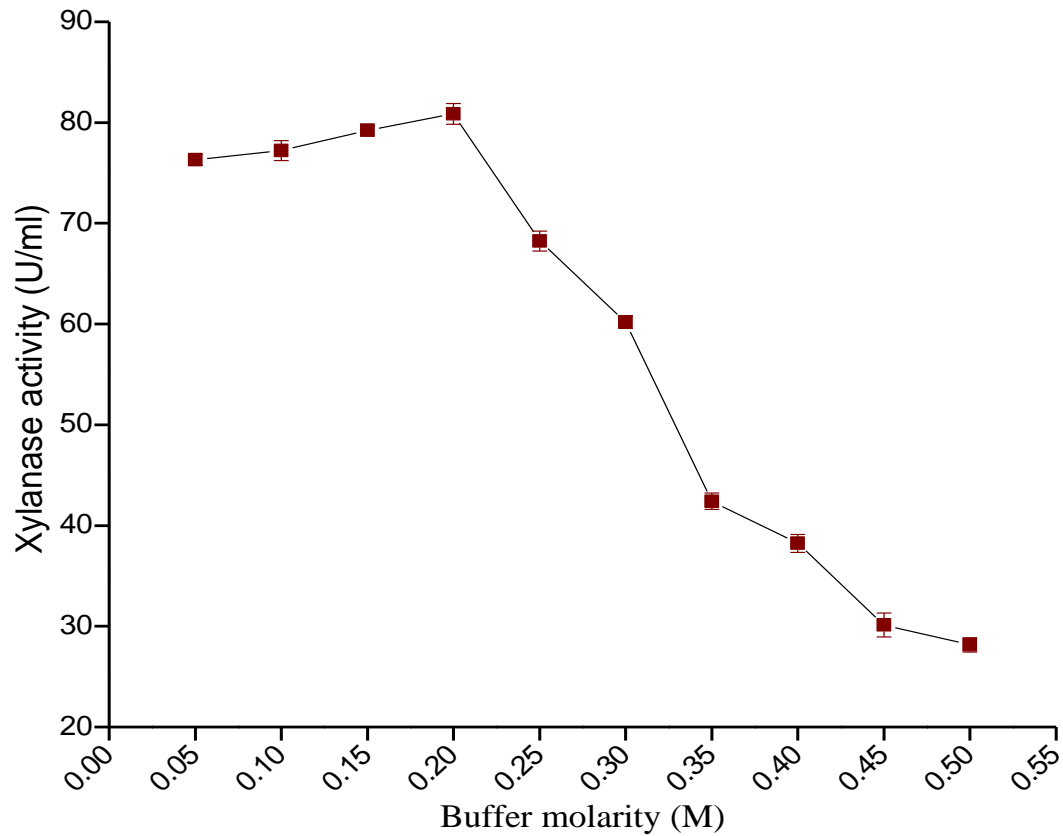

**Supplementary Figure S3:** Effect of buffer molarity on the production of xylanase by XPS7.

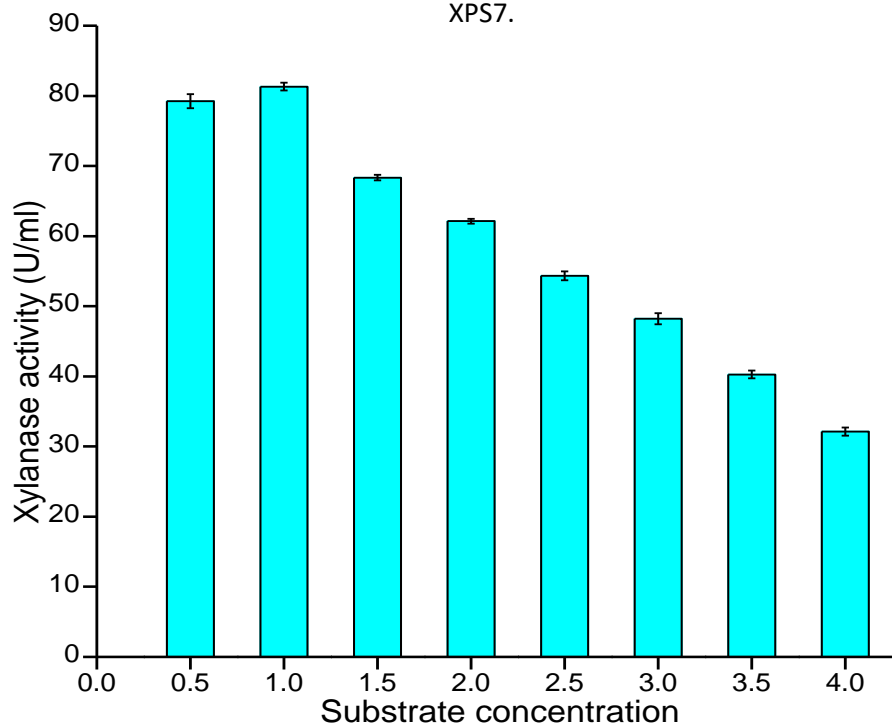

**Supplementary Figure S4:** Effect of substrate concentration on production of xylanase by XPS7.

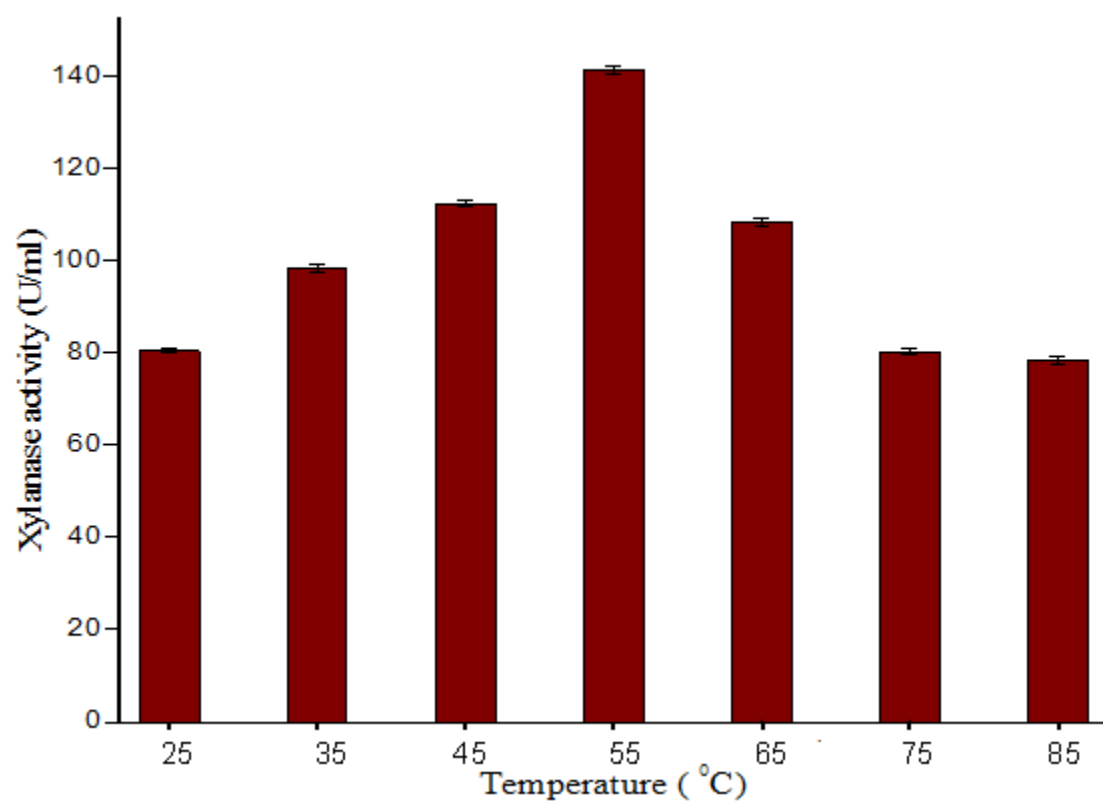

**Supplementary Figure S5:** Effect of incubation temperature on production of xylanase by XPS7.
